# Supplementary material
Source: HighWire-hosted journal article supplement (https://jitc.bmj.com/content/11/2/e006246)
Supplement: inline-supplementary-material-1 [file inline-supplementary-material-1.pdf]

**Supplemental material****Table S1.** Ovid Medline search strategy

| #  | Searches                                                                                                                                                                                                                                                                                  |
|----|-------------------------------------------------------------------------------------------------------------------------------------------------------------------------------------------------------------------------------------------------------------------------------------------|
| 1  | COVID-19.rx,px,ox. or severe acute respiratory syndrome coronavirus 2.os.                                                                                                                                                                                                                 |
| 2  | ("COVID-19" or COVID19 or "COVID 2019" or "novel coronavirus" or "SARS-CoV" or "SARS-CoV-2" or "SARS2" or "2019-nCoV" or ncov19 or ncov-19 or "2019-novel CoV" or sarscov2 or sarscov-2 or Sars-coronavirus2 or Sars-coronavirus-2 or SARS-like coronavirus* or coronavirus-19).ti,ab,kf. |
| 3  | (coronavirus* or "corona virus*").ti,kf.                                                                                                                                                                                                                                                  |
| 4  | Coronavirus Infections/                                                                                                                                                                                                                                                                   |
| 5  | or/1-4                                                                                                                                                                                                                                                                                    |
| 6  | 20191201:20301231.(dt).                                                                                                                                                                                                                                                                   |
| 7  | 5 and 6 [COVID-19, SARS-COV-2]                                                                                                                                                                                                                                                            |
| 8  | limit 7 to english language                                                                                                                                                                                                                                                               |
| 9  | exp Neoplasms/                                                                                                                                                                                                                                                                            |
| 10 | (cancer* or carcinom* or tumor* or tumour* or neoplas* or malignan* or metasta* or myeloma* or leuk?emia* or lymphoma* or sarcoma* or melanoma* or oncolog*).ti,ab,kf.                                                                                                                    |
| 11 | 9 or 10 [Cancer]                                                                                                                                                                                                                                                                          |
| 12 | 8 and 11                                                                                                                                                                                                                                                                                  |
| 13 | (checkpoint adj3 (inhibitor* or modulator* or antibod* or block*).ti,kf,rm.                                                                                                                                                                                                               |
| 14 | (checkpoint and (inhibitor* or modulator* or antibod* or block*).nm.                                                                                                                                                                                                                      |
| 15 | (checkpoint adj3 (inhibitor* or modulator* or antibod* or block*).ab.                                                                                                                                                                                                                     |
| 16 | ((("cytotoxic T lymphocyte associated" adj3 "4") or "CTLA 4" or CTLA4).ti,kf,rm.                                                                                                                                                                                                          |
| 17 | ("Cytotoxic t-lymphocyte antigen" adj3 "4").ti,kf,rm.                                                                                                                                                                                                                                     |
| 18 | ("Cytotoxic t-lymphocyte antigen" or "cytotoxic T lymphocyte associated").nm.                                                                                                                                                                                                             |
| 19 | (ipilimumab or "MDX CTLA 4" or Yervoy or "MDX 010" or MDX010 or "BMS-734016" or BMS734016).mp.                                                                                                                                                                                            |
| 20 | ("Programmed Cell Death 1" or PD1 or "PD 1").ti,kf,rm,nm.                                                                                                                                                                                                                                 |

|    |                                                                                                                                                                                                                                                                                                                       |
|----|-----------------------------------------------------------------------------------------------------------------------------------------------------------------------------------------------------------------------------------------------------------------------------------------------------------------------|
| 21 | (pembrolizumab or Keytruda or Lambrolizumab or "Merck 3475" or Merck3475 or "MK 3475" or MK3475 or "Sch 900475" or Sch900475 or "HSDB 8257").mp.                                                                                                                                                                      |
| 22 | (nivolumab or "BMS 936558" or BMS936558 or "MDX 1106" or MDX1106 or "ONO 4538" or ONO4538 or Opdivo).mp.                                                                                                                                                                                                              |
| 23 | ("AMP 514" or AMP514 or MEDI0680 or "MEDI 0680").mp.                                                                                                                                                                                                                                                                  |
| 24 | ("programmed death ligand 1" or "PD L1" or PDL1 or "B7-H1" or B7HI).ti,kf,tn,nm.                                                                                                                                                                                                                                      |
| 25 | (atezolizumab or Tecentriq or MPDL3280A or "MPDL 3280A" or RO5541267 or RO-5541267 or RG 7446 or RG7446 or "CD274 ANTIGEN" or "CD274 protein").mp.                                                                                                                                                                    |
| 26 | (durvalumab or imfinzi or "MEDI 4736" or MEDI4736).mp.                                                                                                                                                                                                                                                                |
| 27 | (avelumab or Bavencio or MSB0010718C or "MSB 0010718C" or MSB0010682).mp.                                                                                                                                                                                                                                             |
| 28 | ("BMS 936559" or BMS936559 or MDX1105 or "MDX 1105").mp.                                                                                                                                                                                                                                                              |
| 29 | (Cemiplimab or libtayo or REGN2810 or "REGN 2810").mp.                                                                                                                                                                                                                                                                |
| 30 | or/13-29                                                                                                                                                                                                                                                                                                              |
| 31 | 12 and 30 [COVID-19 + cancer patients + immunotherapy (checkpoint inhibitors)]                                                                                                                                                                                                                                        |
| 32 | exp Vaccines/                                                                                                                                                                                                                                                                                                         |
| 33 | exp Vaccination/                                                                                                                                                                                                                                                                                                      |
| 34 | "vaccin*".rn,ox,px,rx.                                                                                                                                                                                                                                                                                                |
| 35 | vaccin*.mp.                                                                                                                                                                                                                                                                                                           |
| 36 | ((covid* or covid19 or covid-19 or SARS-COV-2 or coronavirus) and immuniz*).ti,ab,kf.                                                                                                                                                                                                                                 |
| 37 | (Novavax or "NVX-CoV2373" or NUVAXOVID* or COVOVAX* or Moderna* or "mRNA-1273" or Pfizer* or BioNTech* or BNT162b2* or Janssen* or "Ad26.COVS.S" or AZD1222 or AstraZeneca* or Covishield or Covaxin* or "Bharat Biotech" or Sinopharm or "BBIBP-CorV" or Sinovac or CoronaVac*).mp. [WHO approved Covid-19 vaccines] |
| 38 | or/32-37 [COVID-19 vaccines]                                                                                                                                                                                                                                                                                          |
| 39 | 31 and 38                                                                                                                                                                                                                                                                                                             |

**Table S2.** Ovid Embase search strategy

| #  | Searches                                                                                                                                                                                                                                                                                  |
|----|-------------------------------------------------------------------------------------------------------------------------------------------------------------------------------------------------------------------------------------------------------------------------------------------|
| 1  | ("COVID-19" or COVID19 or "COVID 2019" or "novel coronavirus" or "SARS-CoV" or "SARS-CoV-2" or "SARS2" or "2019-nCoV" or ncov19 or ncov-19 or "2019-novel CoV" or sarscov2 or sarscov-2 or Sars-coronavirus2 or Sars-coronavirus-2 or SARS-like coronavirus* or coronavirus-19).ti,ab,kw. |
| 2  | (coronavirus* or "corona virus*").ti.                                                                                                                                                                                                                                                     |
| 3  | severe acute respiratory syndrome/                                                                                                                                                                                                                                                        |
| 4  | coronavirus infection/                                                                                                                                                                                                                                                                    |
| 5  | "coronavirus disease 2019"/                                                                                                                                                                                                                                                               |
| 6  | or/1-5                                                                                                                                                                                                                                                                                    |
| 7  | limit 6 to english language                                                                                                                                                                                                                                                               |
| 8  | limit 7 to dc=20191201-20221231                                                                                                                                                                                                                                                           |
| 9  | exp malignant neoplasm/                                                                                                                                                                                                                                                                   |
| 10 | (cancer* or neoplas* or tumo?r* or leuk?emia* or lymphoma* or melanoma* or carcinoma* or sarcoma* or oncolog*).ti,ab,kw.                                                                                                                                                                  |
| 11 | 9 or 10                                                                                                                                                                                                                                                                                   |
| 12 | 8 and 11                                                                                                                                                                                                                                                                                  |
| 13 | (immun* adj3 checkpoint adj3 (inhibitor* or modulator* or antibod* or block*).ti,hw,kw.                                                                                                                                                                                                   |
| 14 | ((("cytotoxic T lymphocyte associated" adj3 "4") or "CTLA 4" or CTLA4).ti,kw,hw.                                                                                                                                                                                                          |
| 15 | ("Cytotoxic t-lymphocyte antigen" adj3 "4").ti,kw,hw.                                                                                                                                                                                                                                     |
| 16 | (ipilimumab or "MDX CTLA 4" or Yervoy or "MDX 010" or MDX010 or "BMS-734016" or BMS734016).ti,ab,hw,kw,du,tn.                                                                                                                                                                             |
| 17 | ("Programmed Cell Death 1" or PD1 or "PD 1").ti,kw,hw,du,tn.                                                                                                                                                                                                                              |
| 18 | (pembrolizumab or Keytruda or Lambrolizumab or "Merck 3475" or Merck3475 or "MK 3475" or MK3475 or "Sch 900475" or Sch900475 or "HSDB 8257").ti,ab,kw,hw,du,tn.                                                                                                                           |
| 19 | (nivolumab or "BMS 936558" or BMS936558 or "MDX 1106" or MDX1106 or "ONO 4538" or ONO4538 or Opdivo).ti,ab,kw,hw,du,tn.                                                                                                                                                                   |
| 20 | ("programmed death ligand 1" or "PD L1" or PDL1 or "B7-H1" or B7HI).ti,kw,hw.                                                                                                                                                                                                             |

|    |                                                                                                                                                                                                                                                                                                                       |
|----|-----------------------------------------------------------------------------------------------------------------------------------------------------------------------------------------------------------------------------------------------------------------------------------------------------------------------|
| 21 | (atezolizumab or Tecentriq or MPDL3280A or "MPDL 3280A" or RO5541267 or RO-5541267 or RG 7446 or RG7446 or "CD274 ANTIGEN" or "CD274 protein").ti,ab,kw,hw,du,tn.                                                                                                                                                     |
| 22 | (avelumab or Bavencio or MSB0010718C or "MSB 0010718C" or MSB0010682).ti,ab,kw,hw,du,tn.                                                                                                                                                                                                                              |
| 23 | (Cemiplimab or libtayo or REGN2810 or "REGN 2810").ti,ab,kw,hw,du,tn.                                                                                                                                                                                                                                                 |
| 24 | (durvalumab or imfinzi or "MEDI 4736" or MEDI4736).ti,ab,kw,hw,du,tn.                                                                                                                                                                                                                                                 |
| 25 | or/13-24                                                                                                                                                                                                                                                                                                              |
| 26 | 12 and 25                                                                                                                                                                                                                                                                                                             |
| 27 | exp vaccine/                                                                                                                                                                                                                                                                                                          |
| 28 | exp vaccination/                                                                                                                                                                                                                                                                                                      |
| 29 | vaccin*.ti,ab,kf.                                                                                                                                                                                                                                                                                                     |
| 30 | exp vaccination reaction/                                                                                                                                                                                                                                                                                             |
| 31 | vaccination refusal/                                                                                                                                                                                                                                                                                                  |
| 32 | ((covid* or covid19 or covid-19 or SARS-COV-2 or coronavirus) and immuniz*).ti,ab,kf.                                                                                                                                                                                                                                 |
| 33 | (Novavax or "NVX-CoV2373" or NUVAXOVID* or COVOVAX* or Moderna* or "mRNA-1273" or Pfizer* or BioNTech* or BNT162b2* or Janssen* or "Ad26.COVS.S" or AZD1222 or AstraZeneca* or Covishield or Covaxin* or "Bharat Biotech" or Sinopharm or "BBIBP-CorV" or Sinovac or CoronaVac*).mp. [WHO approved Covid-19 vaccines] |
| 34 | exp immunization/                                                                                                                                                                                                                                                                                                     |
| 35 | or/27-34                                                                                                                                                                                                                                                                                                              |
| 36 | 26 and 35                                                                                                                                                                                                                                                                                                             |

**Table S3.** Types of cancer and funding for each study

| Study ID                                 | Types of cancer                                                                                                                                                                                   | Funding                                                                                                                                                                                                                                                                                                                                                                                                |
|------------------------------------------|---------------------------------------------------------------------------------------------------------------------------------------------------------------------------------------------------|--------------------------------------------------------------------------------------------------------------------------------------------------------------------------------------------------------------------------------------------------------------------------------------------------------------------------------------------------------------------------------------------------------|
| Agbarya 2021 <sup>13</sup>               | Gastrointestinal, breast, lung, urinary, gynecological, other                                                                                                                                     | None                                                                                                                                                                                                                                                                                                                                                                                                   |
| Au 2021 <sup>14</sup>                    | Colorectal cancer                                                                                                                                                                                 | CAPTURE study - Royal Marsden Cancer Charity Programme                                                                                                                                                                                                                                                                                                                                                 |
| Blaise 2021 <sup>15</sup>                | Melanoma                                                                                                                                                                                          | None                                                                                                                                                                                                                                                                                                                                                                                                   |
| Buttiron-Webber 2021 <sup>16</sup>       | Digestive, lung, breast, genitourinary and gynecologic, other.                                                                                                                                    | Association WeCare and the Lions Club of Genoa Sant'Agata and the Italian Minister of Health                                                                                                                                                                                                                                                                                                           |
| Chen 2021 <sup>17</sup>                  | Lung cancer, melanoma, kidney cancer, gastrointestinal, hepatic cancer, head and neck, other.                                                                                                     | NR                                                                                                                                                                                                                                                                                                                                                                                                     |
| Di Giacomo 2021 <sup>18</sup>            | Skin cancer, thoracic malignancies, glioblastoma.                                                                                                                                                 | None                                                                                                                                                                                                                                                                                                                                                                                                   |
| Figueiredo 2021 <sup>19</sup>            | Breast, gastrointestinal, melanoma, thoracic, lymphoma, leukemia, myeloma, other                                                                                                                  | NCI-funded Serological Sciences Network (SeroNet)                                                                                                                                                                                                                                                                                                                                                      |
| Lasagna 2021 <sup>20</sup>               | Lung, melanoma, head and neck, bladder, breast, squamous cell skin cancer                                                                                                                         | Ricerca Corrente, Fondazione IRCCS Policlinico San Matteo, Ricerca Finalizzata, European Commission-Horizon 2020                                                                                                                                                                                                                                                                                       |
| Ligumsky 2021 <sup>21</sup>              | Gastrointestinal, breast, gynecological, genitourinary, skin cancer, melanoma, central nervous system, sarcoma, head and neck, non-small cell lung cancer                                         | None                                                                                                                                                                                                                                                                                                                                                                                                   |
| Ma 2021 <sup>22</sup>                    | Head and neck, gastrointestinal, non-small cell lung cancer                                                                                                                                       | Guangdong science and technology special fund mayor project and Shantou City Science and Technology Plan Project and 2020 Li Ka Shing Foundation Cross-Disciplinary Research Grant and the Fellowship of China Postdoctoral Science Foundation and National Natural Science Foundation of China Youth Science Fund Project and National Natural Science Foundation of China Youth Science Fund Project |
| Massarweh 2021 <sup>23</sup>             | Gastrointestinal, lung, breast, brain, genitourinary, other.                                                                                                                                      | NR                                                                                                                                                                                                                                                                                                                                                                                                     |
| Mieczkowska 2021 <sup>24</sup>           | Hepatocellular carcinoma                                                                                                                                                                          | NR                                                                                                                                                                                                                                                                                                                                                                                                     |
| Naranbhai 2021 <sup>42</sup>             | Thoracic cancer, breast, melanoma, Merkel cell cancer, head and neck, gastrointestinal, leukemia, lymphoma, myeloproliferative neoplasm or myelodysplastic syndrome                               | Lambertus Family Foundation                                                                                                                                                                                                                                                                                                                                                                            |
| Oosting 2021 (VOICE trial) <sup>26</sup> | Bone or soft tissue, breast, central nervous system, digestive tract, endocrine glands, female genital organs, head and neck, male genital organs, respiratory tract, skin, urinary tract, other. | The Netherlands Organization for Health Research and Development                                                                                                                                                                                                                                                                                                                                       |
| Strobel 2021 <sup>27</sup>               | Skin cancer                                                                                                                                                                                       | Projekt DEAL                                                                                                                                                                                                                                                                                                                                                                                           |

|                                |                                                                                                                                                                                                       |                                                                                                                                                                                                                                                         |
|--------------------------------|-------------------------------------------------------------------------------------------------------------------------------------------------------------------------------------------------------|---------------------------------------------------------------------------------------------------------------------------------------------------------------------------------------------------------------------------------------------------------|
| Subbiah 2021 <sup>32</sup>     | Breast, genitourinary, thoracic, hematologic, head and neck, colorectal cancer.                                                                                                                       | American Cancer Society, the Andrew Sabin Family Foundation, Gabrielle's Angels Foundation, Cancer and Aging Research Group (CARG) R21/R33 Infrastructure Grant, Gabrielle's Angel Foundation For Cancer Research<br>U.S. National Institutes of Health |
| Svoboda 2021 <sup>29</sup>     | <i>Hodgkin lymphoma</i>                                                                                                                                                                               | NR                                                                                                                                                                                                                                                      |
| Thakkar 2021 <sup>30</sup>     | Breast, gastrointestinal, genitourinary, gynecological, thoracic, head and neck, skin, musculoskeletal, carcinoma of unknown primary, lymphoid malignancy, myeloid malignancy, plasma cell malignancy | NR                                                                                                                                                                                                                                                      |
| Waissengrin 2021 <sup>31</sup> | Lung, genitourinary, gastrointestinal, melanoma, others                                                                                                                                               | None                                                                                                                                                                                                                                                    |

NA=not applicable; NR=not reported; ICI=immune checkpoint inhibitor; PD-1= programmed cell death 1; PD-L1=programmed cell death ligand 1; <sup>a</sup>patients' relatives, health-care workers, and volunteers, <sup>b</sup>Includes patients receiving other treatments plus ICI

**Table S4.** Results of individual cohort studies

| Study ID                             | ICI Events/Total (%) | Chemotherapy events/total (%) | Cancer patients with no active treatment Events/Total (%) | Individuals without cancer Events/Total (%) | Comments                                    |
|--------------------------------------|----------------------|-------------------------------|-----------------------------------------------------------|---------------------------------------------|---------------------------------------------|
| <b>Seroconversion</b>                |                      |                               |                                                           |                                             |                                             |
| Agbarya 2021                         | 23/26 (88.5)         | 57/70 (81.4)                  | -                                                         | 25/26 (96.2)                                | -                                           |
| Buttiron Webber 2021                 | 20/21 (95.2)         | 92/115 (80)                   | 61/62 (98.4)                                              | -                                           | -                                           |
| Di Giacomo 2021                      | 69/70 (98.6)         | 13/28 (46.4)                  | -                                                         | 42/42 (100)                                 | -                                           |
| Figueiredo 2021                      | 27/29 (93.1)         | 26/26 (100)                   | 13/13 (100)                                               | -                                           | -                                           |
| Lasagna 2021                         | 68/88 (77)           | -                             | -                                                         | -                                           | -                                           |
| Ligumsky 2021                        | 50/55 (90.9)         | 82/101 (81.2)                 | -                                                         | 159/164 (96.9)                              | -                                           |
| Ma 2021                              | 94/138 (68.1)        | -                             | -                                                         | 111/138 (80.4)                              | Sinovac and Sinopharm                       |
| Massarweh 2021                       | 22/22 (100)          | 28/30 (93.3)                  | -                                                         | 78/78 (100)                                 | -                                           |
| Naranbhai 2021                       | 53/54 (98.1)         | 73/77 (94.8)                  | 148/153 (96.7)                                            | -                                           | -                                           |
| Oosting 2021                         | 130/131 (99.2)       | 223/229 (97.4)                | -                                                         | 240/240 (100)                               | -                                           |
| Svoboda 2021                         | 11/12 (92)           | -                             | -                                                         | -                                           | -                                           |
| Thakkar 2021                         | 30/31 (96.8)         | 90/102 (88.2)                 | -                                                         | 55/59 (93.2)                                | -                                           |
| <b>Immune related adverse events</b> |                      |                               |                                                           |                                             |                                             |
| Lasagna 2021                         | 1/88 (1.1)           | -                             | -                                                         | -                                           | 1 patient had colitis and hepatitis grade 3 |

|                                       |                                                                                                                                                                                                                                                                                                                                                            |                |   |                |                                                                                                        |
|---------------------------------------|------------------------------------------------------------------------------------------------------------------------------------------------------------------------------------------------------------------------------------------------------------------------------------------------------------------------------------------------------------|----------------|---|----------------|--------------------------------------------------------------------------------------------------------|
| Ma 2021                               | Pneumonitis: vaccinated 7/127 (5.5) vs no vaccinated 8/127 (6.3)<br>Rash: vaccinated 30/127 (23.6) vs no vaccinated 29/127 (22.8)<br>Arthralgia: vaccinated 17/127 (13.4) vs no vaccinated 18/127 (14.2)<br>Liver function test: vaccinated 16/127 (12.6) vs no vaccinated 15/127 (15.8)<br>Diarrhea: vaccinated 9/127 (7.1) vs no vaccinated 11/127 (8.7) | -              | - | -              |                                                                                                        |
| Chen 2021                             | 0/84                                                                                                                                                                                                                                                                                                                                                       | -              | - | -              | -                                                                                                      |
| Oosting 2021                          | 13/300 (4.3) <sup>a</sup>                                                                                                                                                                                                                                                                                                                                  | -              | - | -              | Most low grade. 1 died from pneumonitis, 1 grade 3 adrenal insufficiency, 1 grade 3 thrombocytopenia   |
| Strobel 2021                          | 15/85 (17)                                                                                                                                                                                                                                                                                                                                                 |                |   |                | 8 patients grade 3: 3 colitis, 1 hepatitis, 2 myositis, 1 myocarditis, 1 both colitis and thyroiditis. |
| Waissengrin 2021                      | 0/134                                                                                                                                                                                                                                                                                                                                                      |                |   |                |                                                                                                        |
| <b>Vaccine related adverse events</b> |                                                                                                                                                                                                                                                                                                                                                            |                |   |                |                                                                                                        |
| Naranbhai 2021                        | -                                                                                                                                                                                                                                                                                                                                                          | -              | - | -              | All cancer patients: 507/671 (75.6%) local or systemic. 89% mild or moderate                           |
| Oosting 2021                          | Fatigue: 78/132 (59)                                                                                                                                                                                                                                                                                                                                       | 111/227 (48.9) | - | 129/238 (54.2) | -                                                                                                      |
|                                       | Pain: 8/132 (6)                                                                                                                                                                                                                                                                                                                                            | 11/227 (5)     | - | 9/238 (4)      | -                                                                                                      |
|                                       | Grade 3 or worse: 3/137 (2)                                                                                                                                                                                                                                                                                                                                | 6/244 (2)      | - | 0/240          | -                                                                                                      |
| Strobel 2021                          | Moderate pain 24/85 (40)<br>Fatigue 20/85 (24)                                                                                                                                                                                                                                                                                                             | -              | - | -              | -                                                                                                      |
| Lasagna 2021                          | 24/88 (27.3)                                                                                                                                                                                                                                                                                                                                               | -              | - | -              | 22 had pain at site of injection, 2 fever                                                              |



|                      |                                           |   |   |   |                                                                                                                                     |
|----------------------|-------------------------------------------|---|---|---|-------------------------------------------------------------------------------------------------------------------------------------|
| Ligumsky 2021        | -                                         | - | - | - | 183/326 (56.1%). Local pain: 19.6%; weakness: 17.5%; myalgia: 12.6%; headache: 6.4%                                                 |
| Ma 2021              | Rash: 35/134 (26.1)                       | - | - | - | No ICI. Rash 10/134 (7.5%)                                                                                                          |
| Buttiron Webber 2021 | -                                         | - | - | - | Cancer patients on active treatment (all treatments): 43/291 (14.8%), mostly mild or moderate                                       |
| Subbiah 2021         | -                                         | - | - | - | Patients with prior ICI had higher increase in itch and rash from their baseline vs patients without systemic treatment (p < 0.05). |
| Svoboda 2021         | Pain: 7/12 (58)<br>Fatigue: 5/12 (42)     | - | - | - | All adverse events were grade 1 or 2                                                                                                |
| Waissengrin 2021     | Pain: 85/134 (63)<br>Fatigue: 45/134 (34) | - | - | - | None of them required admission to hospital or any other special intervention                                                       |

<sup>a</sup>includes patients who received chemoimmunotherapy; ICI=immune checkpoint inhibitors

**Table S5.** Risk of bias of studies included for analysis

| Author                       | Selection                            |                                 |                           |                                                                                                  | Comparability                              |                               | Outcome               |                  |                        | Total score |
|------------------------------|--------------------------------------|---------------------------------|---------------------------|--------------------------------------------------------------------------------------------------|--------------------------------------------|-------------------------------|-----------------------|------------------|------------------------|-------------|
|                              | Representativeness of exposed cohort | Selection of non-exposed cohort | Ascertainment of exposure | Demonstration that outcome of interest was not present at start of study, OR baseline assessment | Adjust for the most important risk factors | Adjust for other risk factors | Assessment of outcome | Follow-up length | Loss to follow-up rate |             |
| ☆☆ Agbarya 2021 <sup>i</sup> |                                      |                                 |                           |                                                                                                  |                                            |                               |                       |                  |                        | 3           |
| ☆☆ Butiron Webber 2021       |                                      |                                 |                           |                                                                                                  |                                            |                               |                       |                  |                        | 5           |
| ☆☆ Chen 2021                 |                                      |                                 |                           |                                                                                                  |                                            |                               |                       |                  |                        | 3           |
| ☆☆☆☆ Di Giacomo 2021         |                                      |                                 |                           |                                                                                                  |                                            |                               |                       |                  |                        | 5           |
| ☆☆☆☆ Figueiredo 2021         |                                      |                                 |                           |                                                                                                  |                                            |                               |                       |                  |                        | 7           |
| ☆☆☆☆ Lasagna 2021            |                                      | NA                              |                           |                                                                                                  |                                            |                               |                       |                  |                        | 4           |
| ☆☆ Ligumsky 2021             |                                      |                                 |                           |                                                                                                  |                                            |                               |                       |                  |                        | 3           |
| ☆☆☆☆ Ma 2021                 |                                      |                                 |                           |                                                                                                  |                                            |                               |                       |                  |                        | 8           |
| ☆☆ Massarweh 2021            |                                      |                                 |                           |                                                                                                  |                                            |                               |                       |                  |                        | 5           |
| ☆☆☆☆ Naranbhai 2022          |                                      |                                 |                           |                                                                                                  |                                            |                               |                       |                  |                        | 8           |
| ☆☆☆☆ Oosting 2021            |                                      |                                 |                           |                                                                                                  |                                            |                               |                       |                  |                        | 8           |
| ☆☆ Strobel 2021              |                                      |                                 |                           |                                                                                                  |                                            |                               |                       |                  |                        | 3           |
| ☆☆☆☆ Subbiah 2021            |                                      |                                 |                           |                                                                                                  |                                            |                               |                       |                  |                        | 6           |
| ☆☆ Svoboda 2021              |                                      |                                 |                           |                                                                                                  |                                            |                               |                       |                  |                        | 3           |
| ☆☆ Thakkar 2021              |                                      |                                 |                           |                                                                                                  |                                            |                               |                       |                  |                        | 4           |
| ☆☆ Waissengrin 2021          |                                      |                                 |                           |                                                                                                  |                                            |                               |                       |                  |                        | 4           |

<sup>i</sup>Cross-sectional study for which we only assessed the domains not related to cohort studies

**Table S6.** Summary of findings table for the comparison: cancer patients treated with ICI versus individuals without cancer**Safety and efficacy of COVID-19 vaccination in cancer patients treated with ICI compared with individuals without cancer****Patient or population:** patients who received COVID-19 vaccine**Setting:** outpatient**Intervention:** ICI**Comparison:** individuals without cancer

| Outcomes                                                                                                       | Anticipated absolute effects*<br>(95% CI)  |                                      | Relative effect<br>(95% CI)      | No of<br>participants<br>(studies)   | Certainty of<br>the evidence<br>(GRADE) | Comments                                                                                                                                                                          |
|----------------------------------------------------------------------------------------------------------------|--------------------------------------------|--------------------------------------|----------------------------------|--------------------------------------|-----------------------------------------|-----------------------------------------------------------------------------------------------------------------------------------------------------------------------------------|
|                                                                                                                | Risk with<br>individuals<br>without cancer | Risk with ICI                        |                                  |                                      |                                         |                                                                                                                                                                                   |
| COVID-19 infection,<br>Severe COVID-19,<br>COVID-19 mortality                                                  | Not reported                               |                                      |                                  |                                      |                                         |                                                                                                                                                                                   |
| Seroconversion<br>assessed with:<br>Proportion of patients'<br>seroconversion:<br>follow-up: median 30<br>days | 950 per 1,000                              | <b>922 per 1,000</b><br>(874 to 979) | <b>RR 0.97</b><br>(0.92 to 1.03) | 1237<br>(5 observational<br>studies) | ⊕○○○<br>Very low <sup>a,b,c</sup>       | We are uncertain whether<br>cancer patients treated with ICI<br>have a lower seroconversion<br>rate after the COVID-19<br>vaccination compared with<br>individuals without cancer |

CI=confidence interval; RR= risk ratio; ICI=immune checkpoint inhibitor; GRADE=Grading of Recommendations, Assessment, Development and Evaluations

Explanations

a. Representativeness of exposed cohort and the adjustment for risk factors were the important items that were not accomplished in most of studies

b. The true effect could either benefit or harm the patient

c. Seroconversion is considered a surrogate outcome and we rated down for indirectness

**Table S7.** Summary of findings for the comparison: cancer patients treated with ICI versus cancer patients without active treatment**Safety and efficacy of COVID-19 vaccination in cancer patients treated with ICI compared with cancer patients without active treatment****Safety and efficacy of COVID-19 vaccination in cancer patients treated with ICI compared with cancer patients treated with chemotherapy****Patient or population:** patients who receive COVID-19 vaccine**Setting:** outpatient**Intervention:** ICI**Comparison:** no active treatment

| Outcomes                                                      | Anticipated absolute effects*<br>(95% CI) |                                        | Relative effect<br>(95% CI)      | № of<br>participants<br>(studies)   | Certainty of<br>the evidence<br>(GRADE) | Comments                                                                                                                                                                                            |
|---------------------------------------------------------------|-------------------------------------------|----------------------------------------|----------------------------------|-------------------------------------|-----------------------------------------|-----------------------------------------------------------------------------------------------------------------------------------------------------------------------------------------------------|
|                                                               | Risk with no<br>active treatment          | Risk with ICI                          |                                  |                                     |                                         |                                                                                                                                                                                                     |
| COVID-19 infection,<br>Severe COVID-19,<br>COVID-19 mortality | Not reported                              |                                        |                                  |                                     |                                         |                                                                                                                                                                                                     |
| Seroconversion<br>follow-up: median 30<br>days                | 974 per 1,000                             | <b>974 per 1,000</b><br>(935 to 1,000) | <b>RR 1.00</b><br>(0.96 to 1.04) | 332<br>(3 observational<br>studies) | ⊕○○○<br>Very low <sup>a,b,c</sup>       | We are uncertain whether<br>cancer patients treated with ICI<br>have a higher seroconversion<br>rate after the COVID-19<br>vaccination compared with<br>cancer patients without active<br>treatment |

CI=confidence interval; RR= risk ratio; ICI=immune checkpoint inhibitor; GRADE=Grading of Recommendations, Assessment, Development and Evaluations

Explanations

a. Representativeness of exposed cohort and the adjustment for risk factors were the important items that were not accomplished in most of studies

b. The true effect could either benefit or harm the patient

c. Seroconversion is considered a surrogate outcome and we rated down for indirectness

**Patient or population:** Patients who receive COVID-19 vaccine

**Setting:** outpatient

**Intervention:** ICI

**Comparison:** chemotherapy

| Outcomes                                                                                                           | Anticipated absolute effects*<br>(95% CI) |                                        | Relative effect<br>(95% CI)      | № of participants<br>(studies)       | Certainty of<br>the evidence<br>(GRADE) | Comments                                                                                                                                                                                       |
|--------------------------------------------------------------------------------------------------------------------|-------------------------------------------|----------------------------------------|----------------------------------|--------------------------------------|-----------------------------------------|------------------------------------------------------------------------------------------------------------------------------------------------------------------------------------------------|
|                                                                                                                    | Risk with<br>Chemotherapy                 | Risk with ICI                          |                                  |                                      |                                         |                                                                                                                                                                                                |
| COVID-19 infection,<br>Severe COVID-19,<br>COVID-19 mortality,<br>follow-up: median 10<br>weeks                    | No events were reported                   |                                        | -                                | (3 observational<br>studies)         | ⊕○○○<br>Very low <sup>a,b</sup>         | -                                                                                                                                                                                              |
| Seroconversion<br>assessed with:<br>Proportion of patients<br>with seroconversion:<br>follow-up: median 30<br>days | 879 per 1,000                             | <b>958 per 1,000</b><br>(879 to 1,000) | <b>RR 1.09</b><br>(1.00 to 1.18) | 1217<br>(9 observational<br>studies) | ⊕○○○<br>Very low <sup>a,b,c</sup>       | We are uncertain whether cancer patients<br>treated with ICI have a higher<br>seroconversion rate after the COVID-19<br>vaccination compared with cancer<br>patients treated with chemotherapy |
| Vaccine related<br>adverse events (grade<br>3 or more): follow-<br>up: median 30 days                              | 8 per 1,000                               | <b>8 per 1,000</b><br>(2 to 29)        | <b>RR 0.98</b> (0.23<br>to 3.50) | 381 (1 study)                        | ⊕○○○<br>Very Low <sup>d</sup>           | We are uncertain whether cancer patients<br>treated with ICI have lower risk of grade<br>3 or more VrAE after mRNA vaccination<br>compared to cancer patients treated with<br>chemotherapy     |

CI=confidence interval; RR= risk ratio; ICI=immune checkpoint inhibitor; GRADE=Grading of Recommendations, Assessment, Development and Evaluations

Explanations

- Representativeness of exposed cohort and the adjustment for risk factors were the important items that were not accomplished in most of studies
- The true effect could either benefit or harm the patient
- Seroconversion is considered a surrogate outcome and we rated down for indirectness
- Low number of events and the true effect could either benefit or harm the patient

**Table S8.** Summary of findings for the comparison: cancer patients treated with ICI versus cancer patients treated with chemotherapy

**Table S9.** Excluded studies

| Study ID     | Reference                                                                                                                                                                                                                                                                                                                                                                                                                                                                                                           | Reason for exclusion                                     |
|--------------|---------------------------------------------------------------------------------------------------------------------------------------------------------------------------------------------------------------------------------------------------------------------------------------------------------------------------------------------------------------------------------------------------------------------------------------------------------------------------------------------------------------------|----------------------------------------------------------|
| Aalberg 2021 | Aalberg JJ, Collins TP, Dobrow EM. Axillary lymphadenopathy in a renal cell carcinoma patient after COVID-19 Vaccination. <i>Radiol Case Rep.</i> 2021 Aug;16(8):2164-2167. doi: 10.1016/j.radcr.2021.05.031. Epub 2021 Jun 11. PMID: 34149984; PMCID: PMC8194501.                                                                                                                                                                                                                                                  | Outcome: not unusual adverse event                       |
| Brest 2021   | Brest P, Mograbi B, Hofman P, Milano G. COVID-19 vaccination and cancer immunotherapy: should they stick together? <i>Br J Cancer.</i> 2022 Jan;126(1):1-3. doi: 10.1038/s41416-021-01618-0. Epub 2021 Nov 19. PMID: 34799696; PMCID: PMC8603902.                                                                                                                                                                                                                                                                   | Study design                                             |
| Da Cruz 2021 | Tomas TD, Eiriz IF, Vitorino M, Vicente RS, Mendes AD, Sousa MS, Braga S, Fiuza TM, Gonçalves LA, Gonçalves CP, Demengeot J. 1602P COVID-19 vaccination efficacy in cancer patients: An ongoing prospective trial. <i>Annals of Oncology.</i> 2021 Sep 1;32:S1147.                                                                                                                                                                                                                                                  | Intervention: no ICI                                     |
| Gauci 2021   | Gauci ML, Coutzac C, Houot R, Marabelle A, Lebbé C; FITC. SARS-CoV-2 vaccines for cancer patients treated with immunotherapies: Recommendations from the French society for Immunotherapy of Cancer (FITC). <i>Eur J Cancer.</i> 2021 May;148:121-123. doi: 10.1016/j.ejca.2021.02.003. Epub 2021 Feb 18. PMID: 33743480; PMCID: PMC7891073.                                                                                                                                                                        | Wrong study design                                       |
| Gomez 2021   | Gomez J, Krammer F, Mack P, Rolfo C, Rohs N, Moore A, King J, Henschke C, Yankelevitz D, Shyr Y, Taioli E. Analysis of lung cancer patients receiving SARS-CoV-2 vaccines revealed a minority subset with poor antibody responses relative to controls. <i>Journal of Thoracic Oncology.</i> 2021:S848-.                                                                                                                                                                                                            | Intervention: data for ICI not reported separated        |
| Hughes 2021  | Hughes NM, Hammer MM, Awad MM, Jacene HA. Radiation Recall Pneumonitis on FDG PET/CT Triggered by COVID-19 Vaccination. <i>Clin Nucl Med.</i> 2022 Mar 1;47(3):e281-e283. doi: 10.1097/RLU.0000000000003980. PMID: 34739397; PMCID: PMC8820752.                                                                                                                                                                                                                                                                     | Outcome: any adverse event                               |
| Hwang 2021   | Hwang JK, Zhang T, Wang AZ, Li Z. COVID-19 vaccines for patients with cancer: benefits likely outweigh risks. <i>J Hematol Oncol.</i> 2021 Feb 27;14(1):38. doi: 10.1186/s13045-021-01046-w. PMID: 33640005; PMCID: PMC7910769.                                                                                                                                                                                                                                                                                     | Wrong study design                                       |
| Karacin 2021 | Karacin C, Eren T, Zeynelgil E, Imamoglu GI, Altinbas M, Karadag I, Basal FB, Bilgetekin I, Sutcuoglu O, Yazici O, Ozdemir N, Ozet A, Yildiz Y, Esen SA, Ucar G, Uncu D, Dinc B, Aykan MB, Erturk İ, Karadurmus N, Civelek B, Çelik İ, Ergun Y, Dogan M, Oksuzoglu OB. Immunogenicity and safety of the CoronaVac vaccine in patients with cancer receiving active systemic therapy. <i>Future Oncol.</i> 2021 Nov;17(33):4447-4456. doi: 10.2217/fo-2021-0597. Epub 2021 Aug 3. PMID: 34342517; PMCID: PMC8336634. | Intervention: less than 3 patients on ICI                |
| Lasagna 2021 | AIOM abstracts. <i>Tumori Journal.</i> 2021;107(2_suppl):1-188. doi:10.1177/03008916211041664                                                                                                                                                                                                                                                                                                                                                                                                                       | Congress abstract: results are the same for Lasagna 2021 |

|               |                                                                                                                                                                                                                                                                                                                                                                                                                                                                                                                                                                                                                                                                                                                                                                                                                            |                                                                              |
|---------------|----------------------------------------------------------------------------------------------------------------------------------------------------------------------------------------------------------------------------------------------------------------------------------------------------------------------------------------------------------------------------------------------------------------------------------------------------------------------------------------------------------------------------------------------------------------------------------------------------------------------------------------------------------------------------------------------------------------------------------------------------------------------------------------------------------------------------|------------------------------------------------------------------------------|
| Lasagna 2022  | Lasagna A, Lilleri D, Agustoni F, Percivalle E, Borgetto S, Alessio N, Comolli G, Sarasini A, Bergami F, Sammartino JC, Ferrari A, Zavaglio F, Arena F, Secondino S, Falzoni M, Schiavo R, Lo Cascio G, Cavanna L, Baldanti F, Pedrazzoli P, Cassaniti I. Analysis of the humoral and cellular immune response after a full course of BNT162b2 anti-SARS-CoV-2 vaccine in cancer patients treated with PD-1/PD-L1 inhibitors with or without chemotherapy: an update after 6 months of follow-up. <i>ESMO Open</i> . 2022 Feb;7(1):100359. doi: 10.1016/j.esmoop.2021.100359. Epub 2021 Dec 11. PMID: 34973510; PMCID: PMC8664661.                                                                                                                                                                                         | Outcome: humoral response at 6 months follow-up                              |
| Luo 2021      | Luo B, Li J, Hou X, Yang Q, Zhou Y, Ye J, Wu X, Feng Y, Hu T, Xu Z, He Y, Sun J. Indications for and contraindications of immune checkpoint inhibitors in cancer patients with COVID-19 vaccination. <i>Future Oncol</i> . 2021 Sep;17(26):3477-3484. doi: 10.2217/fon-2021-0288. Epub 2021 Jun 30. PMID: 34189948; PMCID: PMC8244550.                                                                                                                                                                                                                                                                                                                                                                                                                                                                                     | Study design                                                                 |
| Malek 2022    | Malek AE, Cornejo PP, Daoud N, Alam M. The mRNA COVID-19 vaccine in patients with cancer receiving checkpoint inhibitor therapy: what we know and what we don't. <i>Immunotherapy</i> . 2022 Feb;14(2):91-94. doi: 10.2217/imt-2021-0235. Epub 2021 Nov 8. PMID: 34747190; PMCID: PMC8582594.                                                                                                                                                                                                                                                                                                                                                                                                                                                                                                                              | Study design                                                                 |
| Malissen 2021 | Malissen N, Ninove L, de Lamballerie X, André N, Gaudy-Marqueste C. Safety and immunogenicity after 2 doses of the BNT162b2 COVID-19 vaccine in an early-phase oncology trial centre population. <i>Eur J Cancer</i> . 2021 Oct;156:125-126. doi: 10.1016/j.ejca.2021.07.040. Epub 2021 Aug 10. PMID: 34438245; PMCID: PMC8352671.                                                                                                                                                                                                                                                                                                                                                                                                                                                                                         | Intervention: data for ICI not reported separated                            |
| Monin 2021    | Monin L, Laing AG, Muñoz-Ruiz M, McKenzie DR, Del Molino Del Barrio I, Alaguthurai T, Domingo-Vila C, Hayday TS, Graham C, Seow J, Abdul-Jawad S, Kamdar S, Harvey-Jones E, Graham R, Cooper J, Khan M, Vidler J, Kakkassery H, Sinha S, Davis R, Dupont L, Francos Quijorna I, O'Brien-Gore C, Lee PL, Eum J, Conde Poole M, Joseph M, Davies D, Wu Y, Swampillai A, North BV, Montes A, Harries M, Rigg A, Spicer J, Malim MH, Fields P, Patten P, Di Rosa F, Papa S, Tree T, Doores KJ, Hayday AC, Irshad S. Safety and immunogenicity of one versus two doses of the COVID-19 vaccine BNT162b2 for patients with cancer: interim analysis of a prospective observational study. <i>Lancet Oncol</i> . 2021 Jun;22(6):765-778. doi: 10.1016/S1470-2045(21)00213-8. Epub 2021 Apr 27. PMID: 33930323; PMCID: PMC8078907. | Intervention: outcomes measure after first dose in patients treated with ICI |
| Saini 2021    | Saini KS, Martins-Branco D, Tagliamento M, Vidal L, Singh N, Punie K, Saini ML, Chico I, Curigliano G, de Azambuja E, Lambertini M. Emerging issues related to COVID-19 vaccination in patients with cancer. <i>Oncol Ther</i> . 2021 Dec;9(2):255-265. doi: 10.1007/s40487-021-00157-1. Epub 2021 Jun 16. PMID: 34137014; PMCID: PMC8208766.                                                                                                                                                                                                                                                                                                                                                                                                                                                                              | Study design                                                                 |
| Terpos 2021   | Terpos E, Zagouri F, Lontos M, Sklirou AD, Koutsoukos K, Markellos C, Briasoulis A, Papanagnou ED, Trougakos IP, Dimopoulos MA. Low titers of SARS-CoV-2 neutralizing antibodies after first vaccination dose in cancer patients receiving checkpoint inhibitors. <i>J Hematol Oncol</i> . 2021 May 31;14(1):86. doi: 10.1186/s13045-021-01099-x. PMID: 34059088; PMCID: PMC8165511.                                                                                                                                                                                                                                                                                                                                                                                                                                       | Intervention: 1 dose of the vaccine                                          |

|                  |                                                                                                                                                                                                                                                                                                                                                                                                                                                                                                                                                                                                                                                                                                                                                                                                                                                                                                                                                                                                                                                                                                                                                                                                                                                                                                                                                                                                                                                                                                                                                                                                                                                                                                                                      |              |
|------------------|--------------------------------------------------------------------------------------------------------------------------------------------------------------------------------------------------------------------------------------------------------------------------------------------------------------------------------------------------------------------------------------------------------------------------------------------------------------------------------------------------------------------------------------------------------------------------------------------------------------------------------------------------------------------------------------------------------------------------------------------------------------------------------------------------------------------------------------------------------------------------------------------------------------------------------------------------------------------------------------------------------------------------------------------------------------------------------------------------------------------------------------------------------------------------------------------------------------------------------------------------------------------------------------------------------------------------------------------------------------------------------------------------------------------------------------------------------------------------------------------------------------------------------------------------------------------------------------------------------------------------------------------------------------------------------------------------------------------------------------|--------------|
| Tougeron<br>2021 | Tougeron D, Hentzien M, Seitz-Polski B, Bani-Sadr F, Bourhis J, Ducreux M, Gaujoux S, Gorphe P, Guiu B, Hoang-Xuan K, Huguet F, Lecomte T, Lièvre A, Louvet C, Maggiori L, Mansi L, Mariani P, Michel P, Servettaz A, Thariat J, Westeel V, Aparicio T, Blay JY, Bouché O; for Thésaurus National de Cancérologie Digestive (TNCD); réseau de Groupes Coopérateurs en Oncologie (GCO); Fédération Nationale des Centres de Lutte Contre le Cancer (UNICANCER); Association de Chirurgie Hépatobiliaire-Pancréatique et Transplantation (ACHBT); Association de Recherche sur les Cancers Gynécologiques-Groupes d'Investigateurs Nationaux pour l'étude des Cancers Ovariens et du Sein (ARCAGY-GINECO); Fédération Francophone de Cancérologie Digestive (FFCD); Groupe Coopérateur multidisciplinaire en Oncologie (GERCOR); Groupe d'Oncologie Radiothérapie Tête et Cou-Intergroupe ORL (GORTEC-Intergroupe ORL); Intergroupe Francophone de Cancérologie Thoracique (IFCT); InterGroupe Coopérateur de Neuro-Oncologie/Association des Neuro-Oncologues d'Expression Française (IGCNO-ANOCEF); Société Française de Chirurgie Digestive (SFCD); Société Française d'Endoscopie Digestive (SFED); Société Française de Radiothérapie Oncologique (SFRO); Société Française de Radiologie (SFR); Société Nationale Française de Colo-Proctologie (SNFCP); Société Nationale Française de Gastroentérologie (SNFGE). Severe acute respiratory syndrome coronavirus 2 vaccination for patients with solid cancer: Review and point of view of a French oncology intergroup (GCO, TNCD, UNICANCER). <i>Eur J Cancer</i> . 2021 Jun;150:232-239. doi: 10.1016/j.ejca.2021.03.030. Epub 2021 Apr 1. PMID: 33934060; PMCID: PMC8015403. | Study design |
| Yedekuz<br>2021  | mRNA-based COVID-19 vaccines appear not to increase immune events in cancer patients receiving immune checkpoint inhibitors                                                                                                                                                                                                                                                                                                                                                                                                                                                                                                                                                                                                                                                                                                                                                                                                                                                                                                                                                                                                                                                                                                                                                                                                                                                                                                                                                                                                                                                                                                                                                                                                          | Study design |

ICI=immune checkpoint inhibitor
